# Supplementary material
Source: MDPI journal article supplement (https://www.mdpi.com/2073-4395/11/2/296)
Supplement: s1 [file s1]

## Supplementary Materials

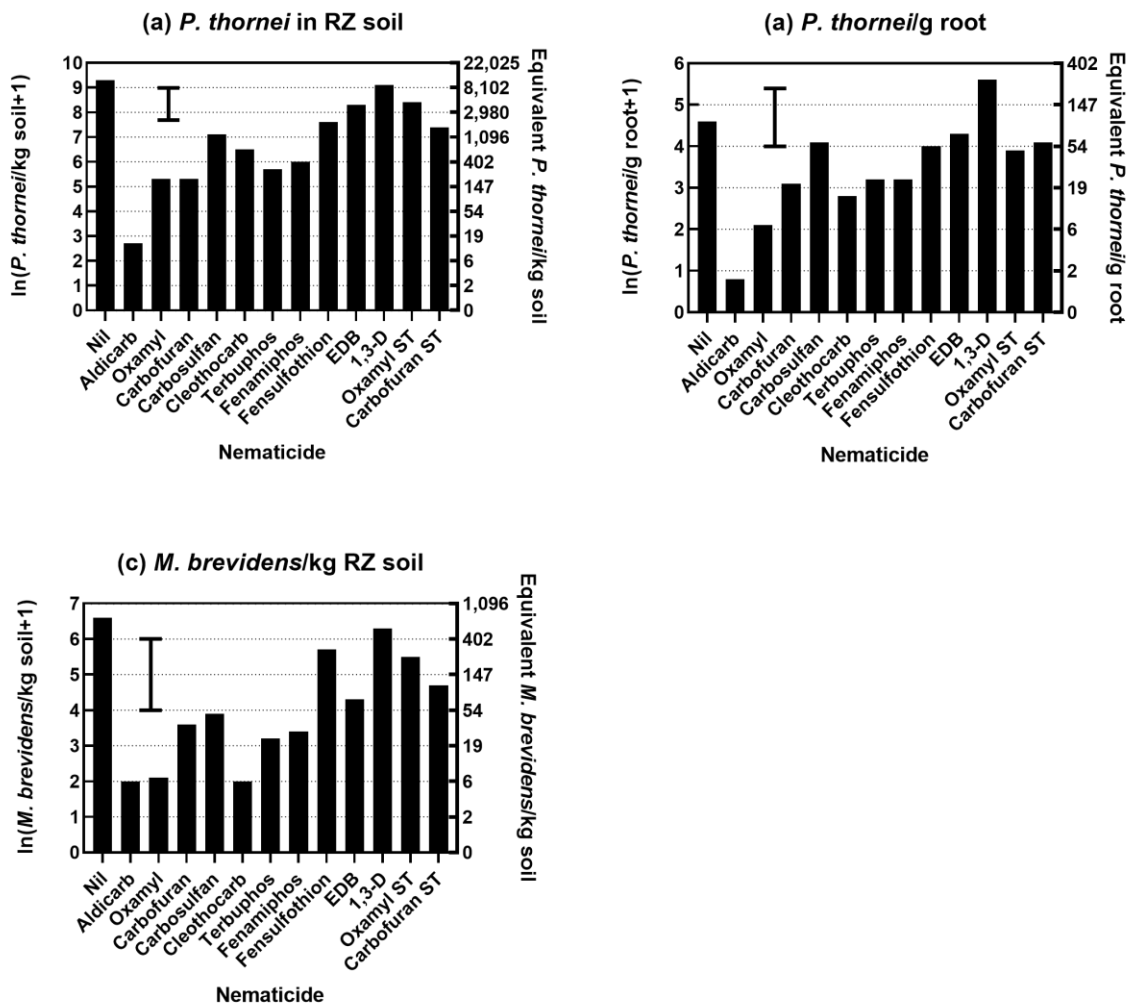

**Figure S1.** Main effects of nematicides (highest rate of each) on (a) *Pratylenchus thornei* in the root zone soil (0–20 cm depth), (b) *P. thornei*/g roots (0–20 cm depth); and (c) *Merlinius brevidens* in the root-zone soil (0–20 cm depth) at wheat stem elongation (Z32) at 72 days after sowing in Experiment 4 at Pirrinuan. Fertiliser had no significant effect on nematode populations. Bar markers = l.s.d. ( $P=0.05$ ).

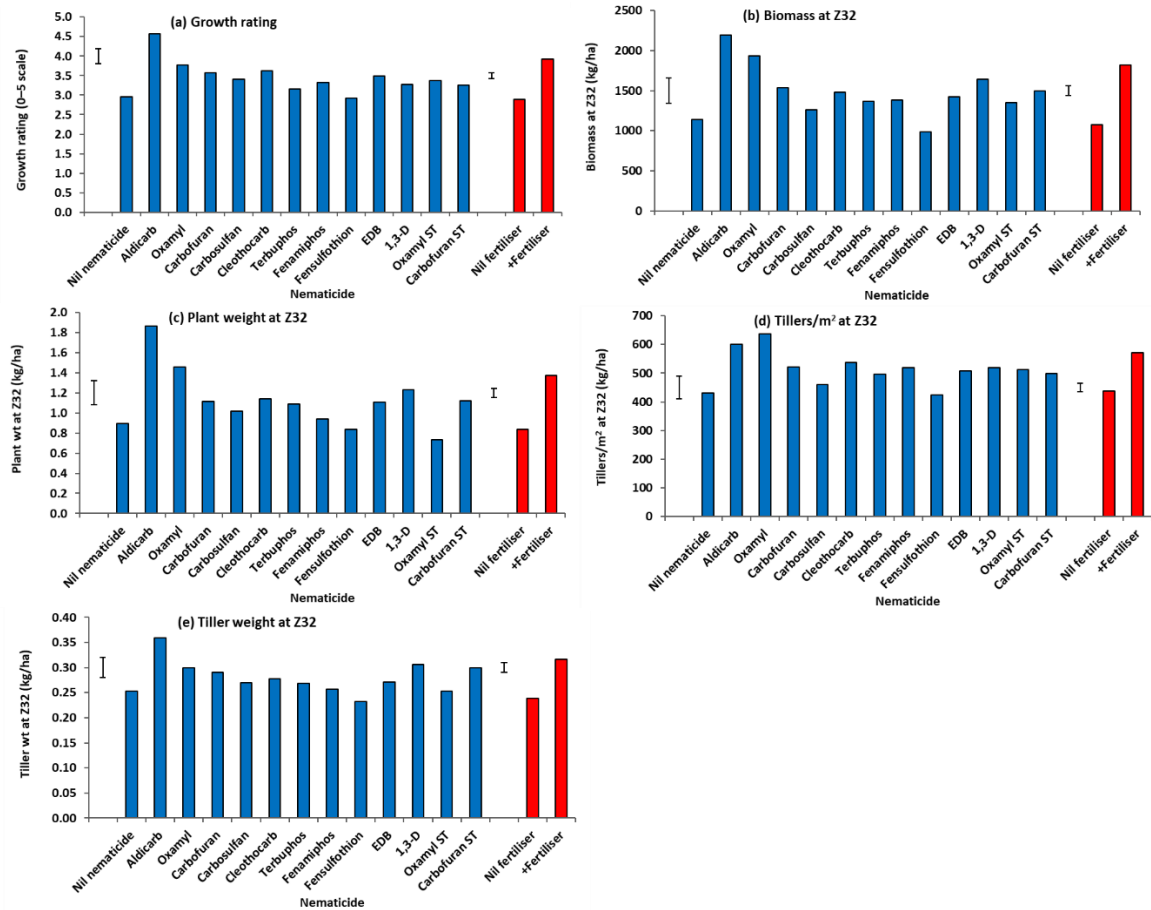

**Figure S2.** Main effects of nematicides (highest rate of each) and fertiliser (N120P30Zn15 kg/ha) on (a) growth rating (0–5 scale) of wheat plants at 63 DAS (b) biomass (kg/ha) at Z32 (stem elongation) 72 DAS, (c) dry weight/plant at Z32, (d) tiller number/m<sup>2</sup> at Z32, (e) dry weight/tiller at Z32 in Experiment 4 at Pirrinuan. Bar markers = l.s.d. ( $P=0.05$ ).

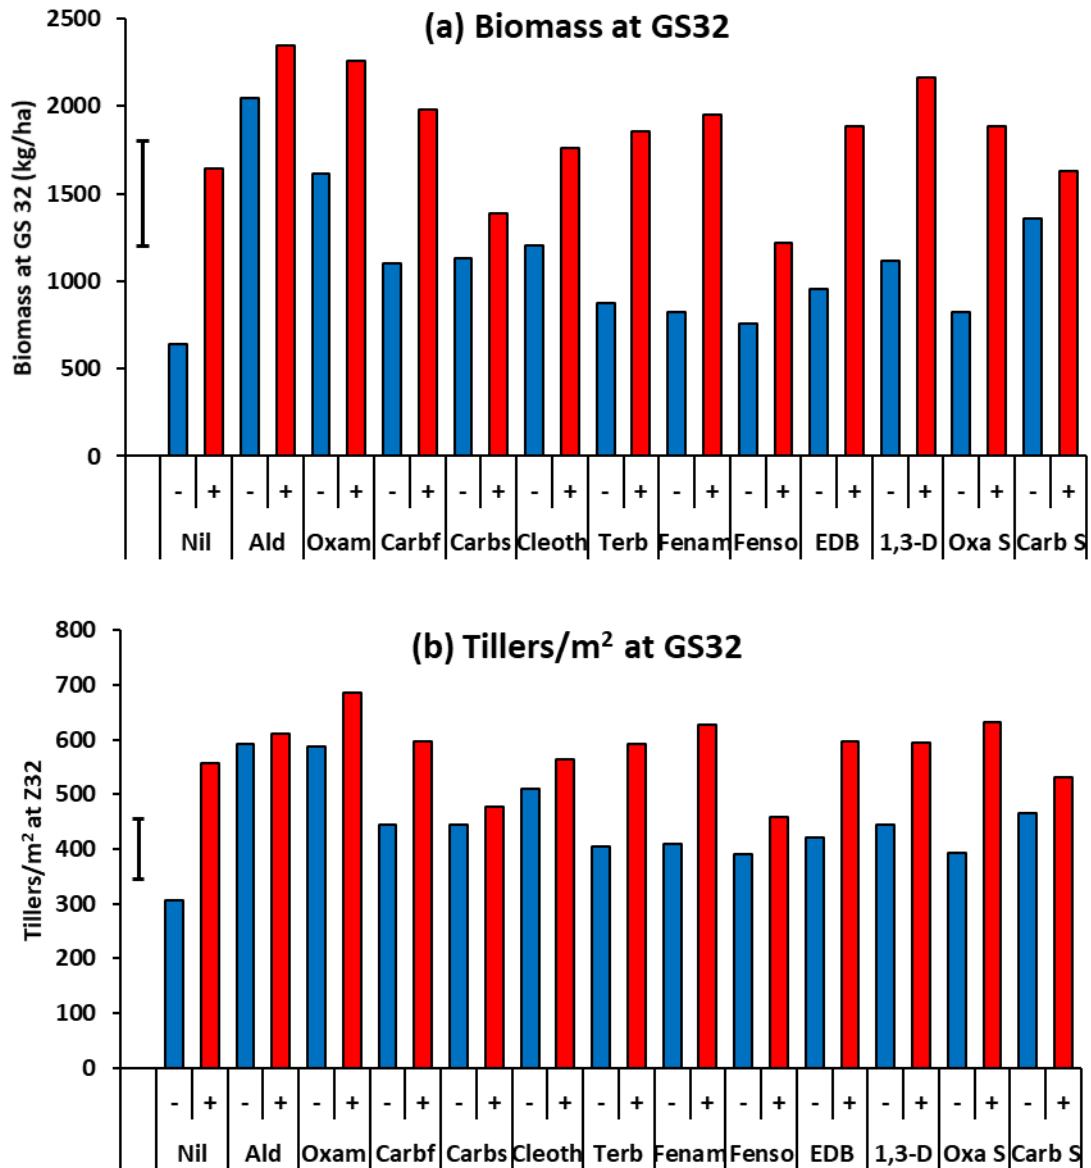

**Figure S3.** Interactive effects of nematicides (highest rate of each) and fertiliser ( $\pm$  N120P30Zn15 kg/ha) on (a) biomass (kg/ha) at Z32 (stem elongation at 72 DAS), and (b) tillers/m<sup>2</sup> at Z32 in Experiment 4 at Pirrinuan. Where abbreviated nematicide names are: Ald = aldicarb, Oxam = oxamyl, Carbf = carbofuran, Carbs = carbosulfan, Ceoth = cleothocarb, Terb = terbufos, Fenam = fenamiphos, Fenso = fensulphion, EDB = ethylend dibromide, 1,3-D = 1,3-dichloropropene, Oxa S = oxamyl seed treater, Carb S = carbofuran seed treater. Bar markers = l.s.d. ( $P=0.05$ ).

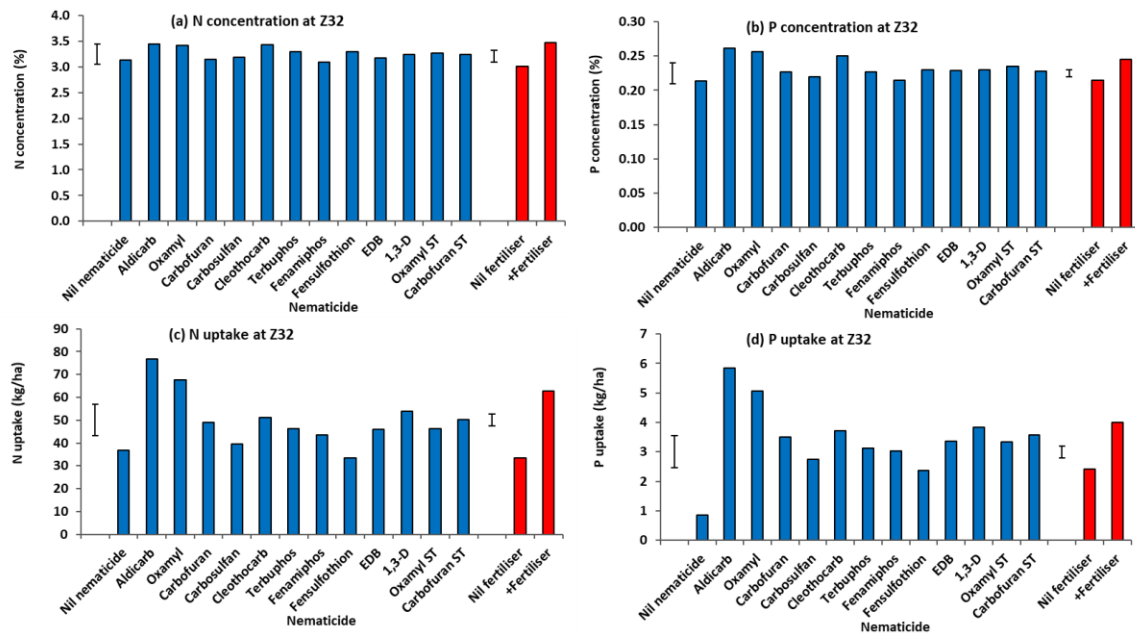

**Figure S4.** Main effects of nematicides (highest rate of each) and fertiliser (N120P30Zn15 kg/ha) on N and P nutrition of whole plant tops at Z32 (stem elongation) on 72 DAS, (a) N concentration (b) P concentration (c) N uptake/ha and (d) P uptake/ha in Experiment 4 at Pirrinuan. Bar markers = 1 s.d. ( $P=0.05$ ).

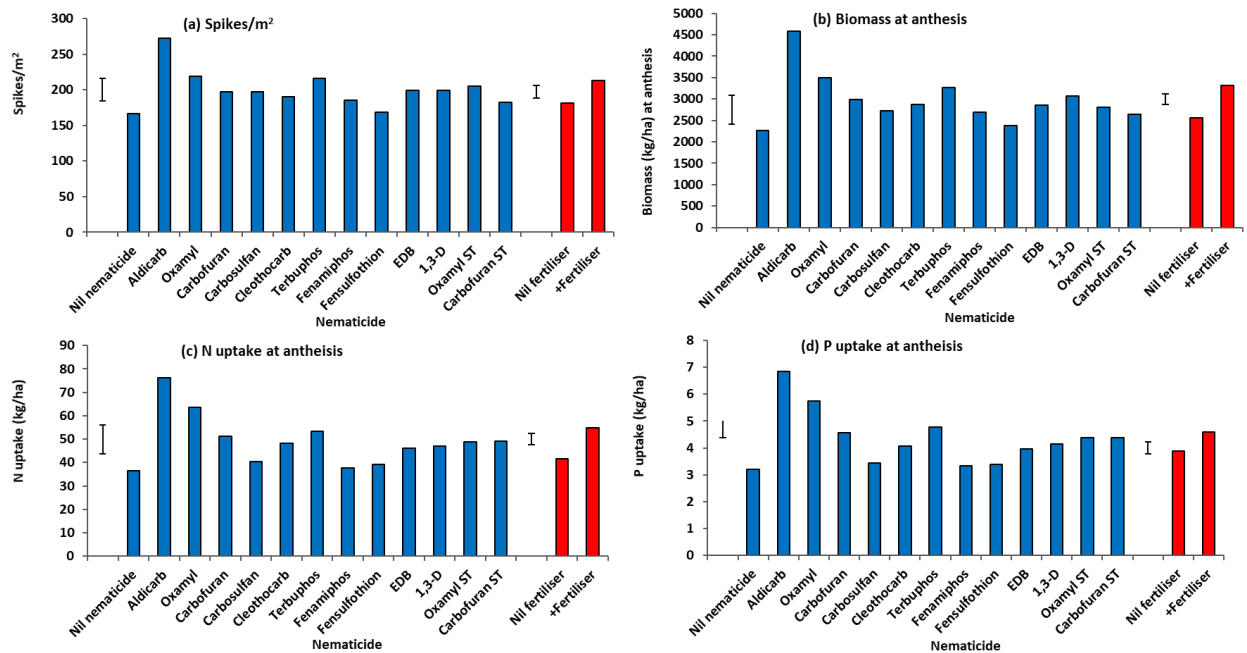

**Figure S5.** Main effects of nematicides (highest rate of each) and fertiliser (N120P30Zn15 kg/ha) on wheat plants at Z65 (anthesis) on 107 DAS for (a) spike density (b) biomass (c) N uptake/ha and (d) P uptake/ha in Experiment 4 at Pirrinuan. Bar markers = 1 s.d. ( $P=0.05$ ).

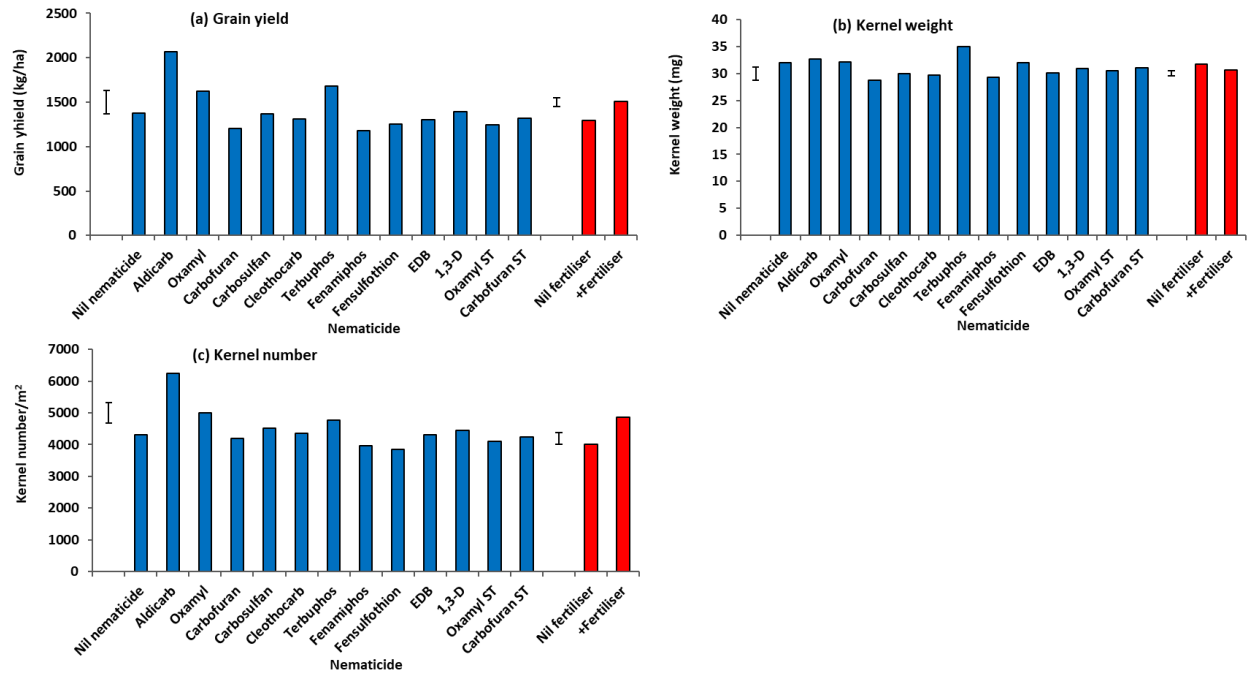

**Figure S6.** Main effects of nematicides (highest rate of each) and fertiliser (N120P30Zn15 kg/ha) on (a) grain yield (b) kernel weight and (c) kernel number/m<sup>2</sup> in Experiment 4 at Pirrinuan. Bar markers = l.s.d. ( $P=0.05$ ).

**Table S1.** Soil properties of (a) Formartin site and (b) Macalister site. Values are means of duplicate laboratory analysis of composite samples of nine cores from the field.

**(a) Formartin**

| Soil profile<br>depth (cm) | Particle size |      |      | Organi |       | pH  | Electrical<br>Conductivity<br>(EC <sub>1:5</sub> , dS/m) |
|----------------------------|---------------|------|------|--------|-------|-----|----------------------------------------------------------|
|                            | Sand          | Silt | Clay | c      | Total |     |                                                          |
|                            |               |      |      | C      | N     |     |                                                          |
|                            | (%)           | (%)  | (%)  | (%)    | (%)   |     |                                                          |
| 0-15                       | 16.5          | 15.9 | 67.6 | 0.96   | 0.059 | 8.5 | 0.283                                                    |
| 15-30                      | 20.5          | 10.4 | 69.1 | 0.95   | 0.041 | 8.9 | 0.276                                                    |
| 30-60                      | 16.8          | 12.3 | 71.0 | 0.79   | 0.035 | 9.1 | 0.396                                                    |
| 60-90                      | 12.8          | 14.3 | 72.9 | 0.66   | 0.030 | 9.3 | 0.666                                                    |
| 90-120                     | 13.7          | 13.5 | 72.8 | 0.61   | 0.023 | 9.2 | 1.212                                                    |
| Method <sup>a</sup>        | D65           |      |      | 6A1    | 7A2   | 4A1 | 3A1                                                      |

**(b) Macalister**

| Soil profile<br>depth (cm) | Particle size |      |      | Organi |       | pH  | Electrical<br>Conductivity<br>(EC <sub>1:5</sub> , dS/m) |
|----------------------------|---------------|------|------|--------|-------|-----|----------------------------------------------------------|
|                            | Sand          | Silt | Clay | c      | Total |     |                                                          |
|                            |               |      |      | C      | N     |     |                                                          |
|                            | (%)           | (%)  | (%)  | (%)    | (%)   |     |                                                          |
| 0-15                       | 19.5          | 12.7 | 67.8 | 0.86   | 0.071 | 8.6 | 0.269                                                    |
| 15-30                      | 19.0          | 11.2 | 69.9 | 0.66   | 0.058 | 8.9 | 0.346                                                    |
| 30-60                      | 21.0          | 10.6 | 68.5 | 0.64   | 0.056 | 9.0 | 0.418                                                    |
| 60-90                      | 17.2          | 11.7 | 71.2 | 0.66   | 0.054 | 9.0 | 0.674                                                    |
| 90-120                     | 13.9          | 14.3 | 71.9 | 0.58   | 0.043 | 9.0 | 0.873                                                    |
| Method <sup>a</sup>        | D65           |      |      | 6A1    | 7A2   | 4A1 | 3A1                                                      |

<sup>a</sup>Method: D65 = pipette method (Day 1965); other codes from Rayment and Higginson (1992)

**Table S6.** Effects of nematicides with and without fertiliser (N120P30Zn15 kg/ha) on percentage of the root length colonised with arbuscular mycorrhizal fungi for wheat cv. Banks sampled at Z40 (booting) from Experiment 2 at Macalister. Values transformed by  $\arcsin \sqrt{\text{proportion}}$  for ANOVA with backtransformed values as % in parentheses

| Nematicide                                                                                                 | Rate      | Nil fertiliser | Plus fertiliser |
|------------------------------------------------------------------------------------------------------------|-----------|----------------|-----------------|
| Nil                                                                                                        | 4 kg/ha   | 0.506 (23.5)   | 0.545 (26.9)    |
| Aldicarb                                                                                                   | 4 kg/ha   | 0.526 (25.3)   | 0.493 (22.4)    |
| Aldicarb                                                                                                   | 10 kg/ha  | 0.515 (24.2)   | 0.533 (25.9)    |
| Oxamyl                                                                                                     | 4 kg/ha   | 0.517 (24.4)   | 0.504 (23.3)    |
| Carbofuran                                                                                                 | 4 kg/ha   | 0.601 (31.9)   | 0.616 (33.4)    |
| Carbosulfan                                                                                                | 4 kg/ha   | 0.581 (30.1)   | 0.457 (19.5)    |
| Terbufos                                                                                                   | 4 kg/ha   | 0.606 (32.4)   | 0.495 (22.6)    |
| Fenamiphos                                                                                                 | 4 kg/ha   | 0.618 (33.5)   | 0.394 (14.8)    |
| Fensulphion                                                                                                | 4 kg/ha   | 0.478 (21.1)   | 0.531 (25.6)    |
| EDB                                                                                                        | 14.8 L/ha | 0.534 (25.9)   | 0.608 (32.6)    |
| 1,3-dichlopropene                                                                                          | 27.6 L/ha | 0.546 (27.0)   | 0.445 (18.6)    |
| Mean                                                                                                       |           | 0.548 (27.1)   | 0.511 (23.9)    |
| F test for treatments was non-significant; SEM nematicides = 0.038; fertiliser = 0.016; nem x fert = 0.053 |           |                |                 |
